# Supplementary material for: Novel electro-optic chromophores based on substituted benzo[1,2-b:4,5-b′]dithiophene π-conjugated bridges
Source: Royal Society of Chemistry journal article supplement (doi:10.1039/c4ra01767f), 2014-01-01

## *Supporting Information*

### **Novel Electro-optic Chromophores Based on Substituted Benzo[1,2-b:4,5-b']dithiophene $\pi$ -Conjugated Bridges**

*<sup>a</sup>Key Laboratory of Photochemical Conversion and Optoelectronic Materials, Technical Institute of Physics and Chemistry, Chinese Academy of Sciences, Beijing 100190, PR China. Tel.: +86-01-82543528; Fax: +86-01-62554670. E-mail: xinhouliu@foxmail.com and xhliu@mail.ipc.ac.cn (X. Liu)*

*<sup>b</sup> University of Chinese Academy of Sciences, Beijing 100043, PR China*

### **Contents**

1. Figures 1-8. NMR spectra of resulted compounds.
2. Figures 9-10. HRMS spectra of resulted chromophores.

Figure 1.  $^1\text{H}$  NMR spectrum of compound 1

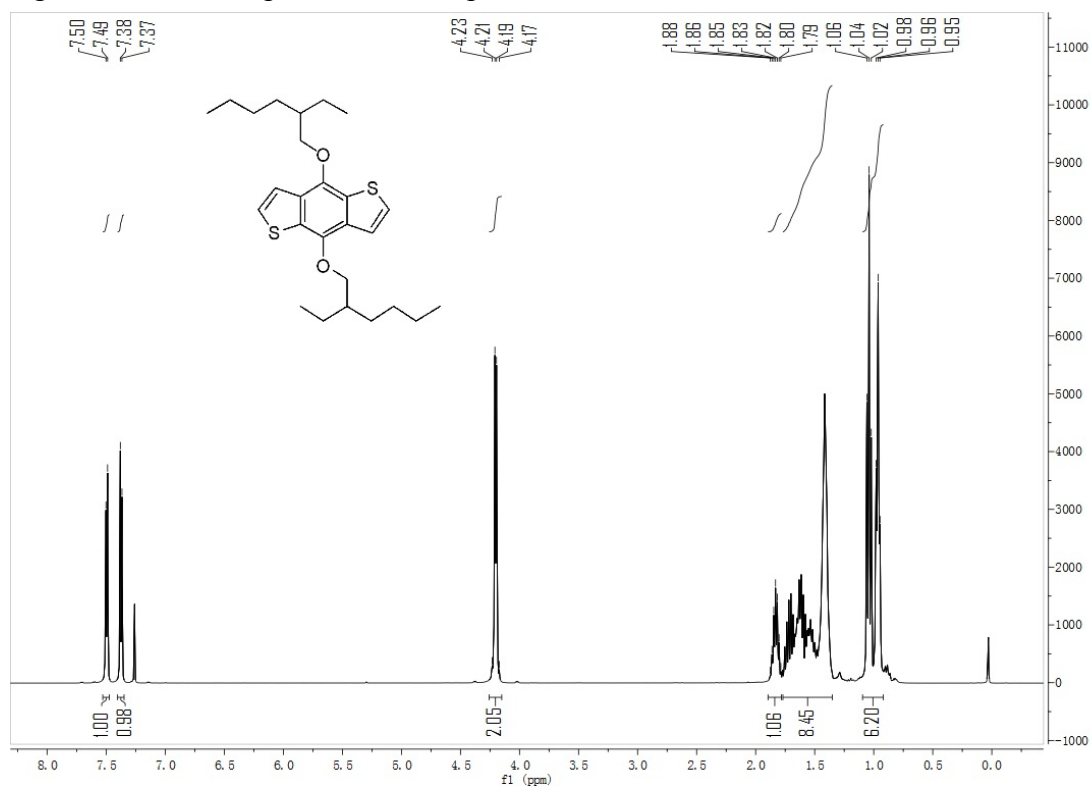

Figure 2.  $^1\text{H}$  NMR spectrum of compound 2

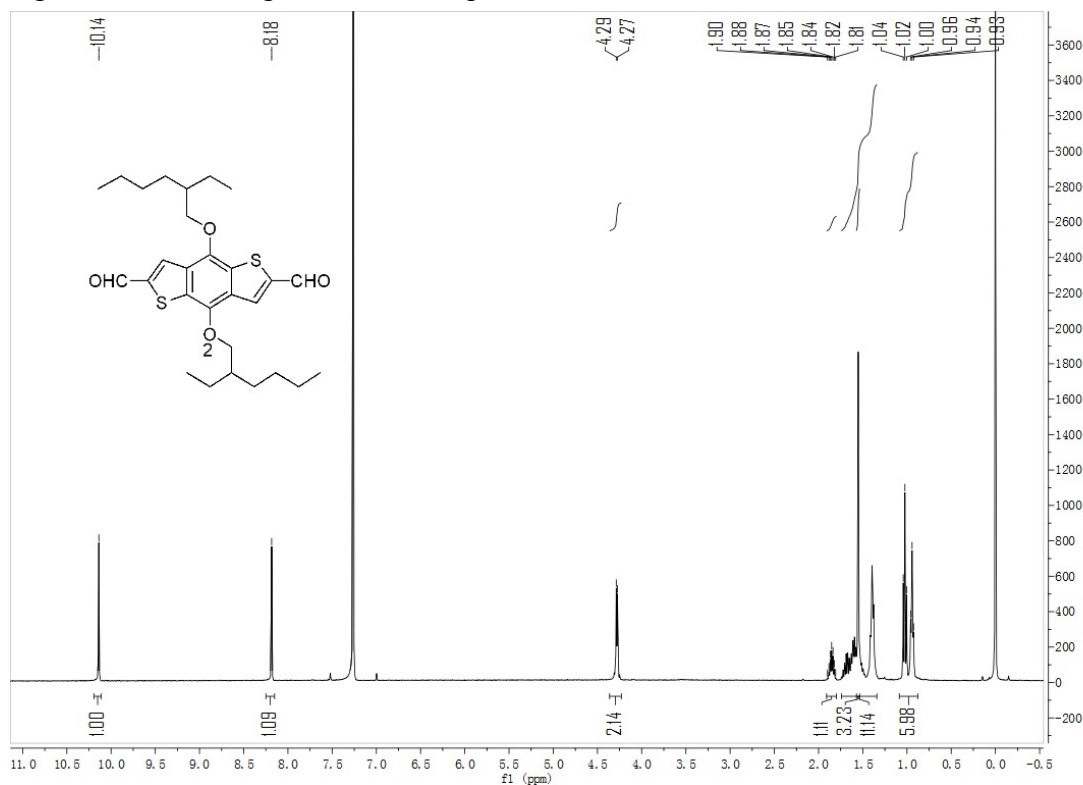

Figure 3.  $^1\text{H}$  NMR spectrum of compound 4

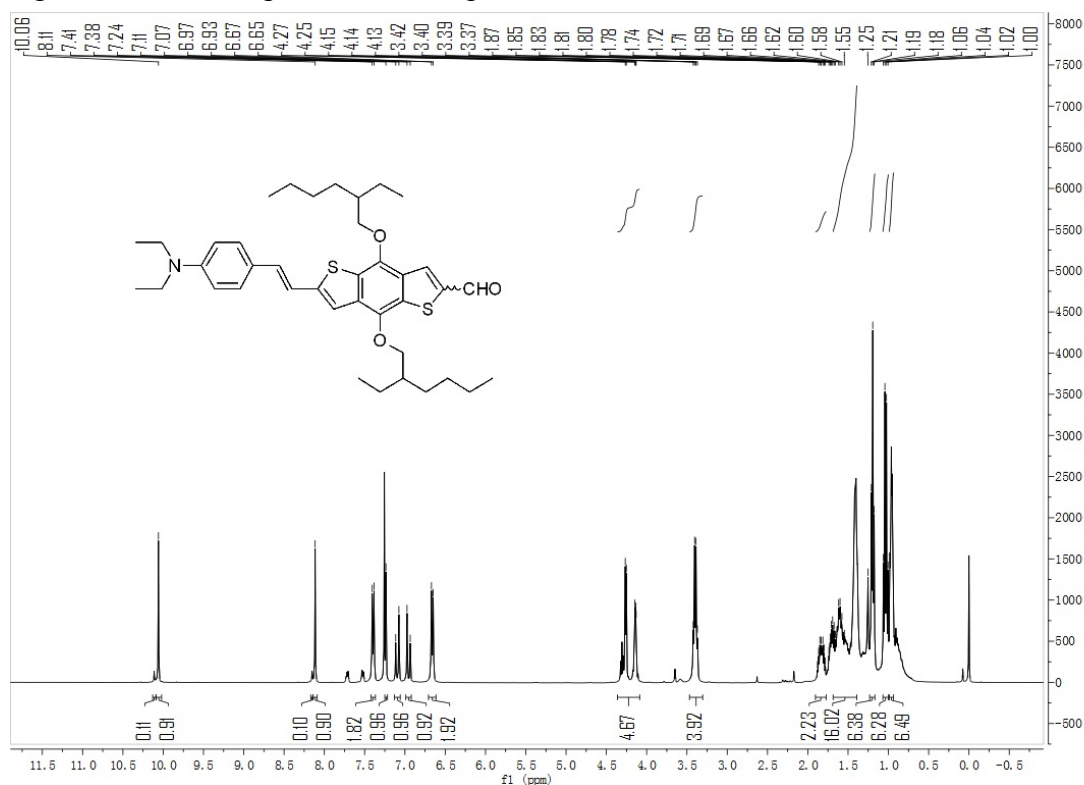

Figure 4.  $^1\text{H}$  NMR spectrum of compound 5

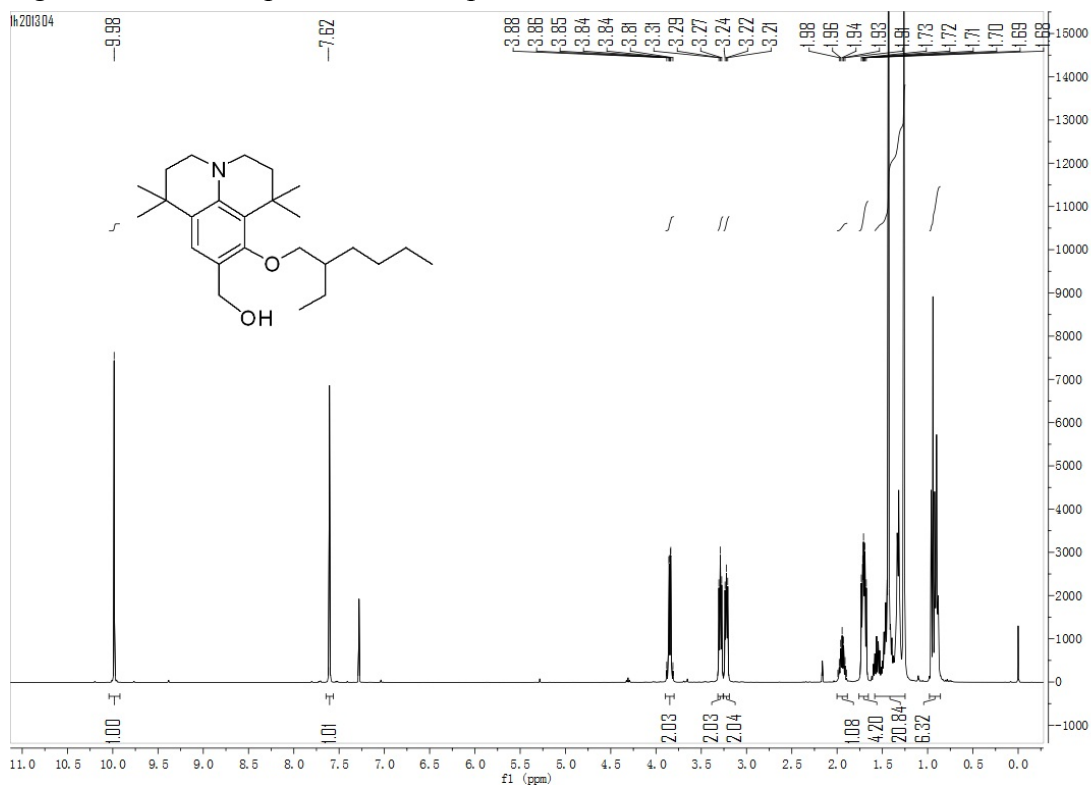

Figure 5.  $^1\text{H}$  NMR spectrum of compound 7

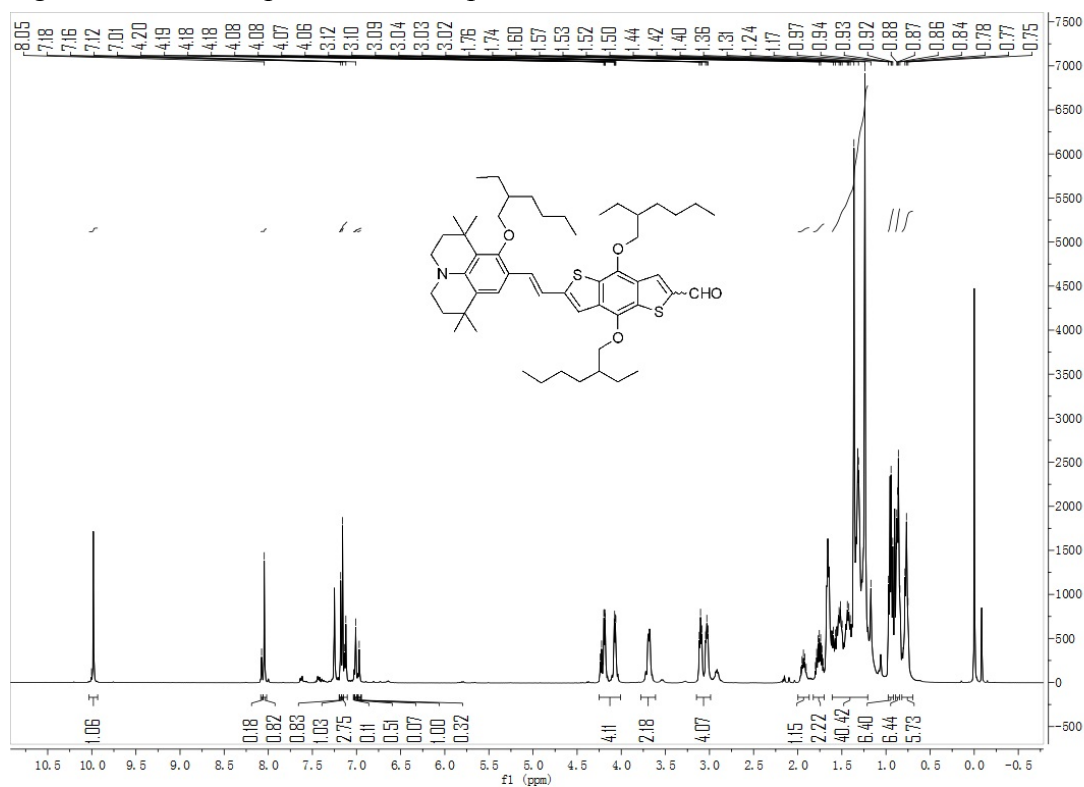

Figure 6.  $^1\text{H}$  NMR spectrum of chromophore BDT 3

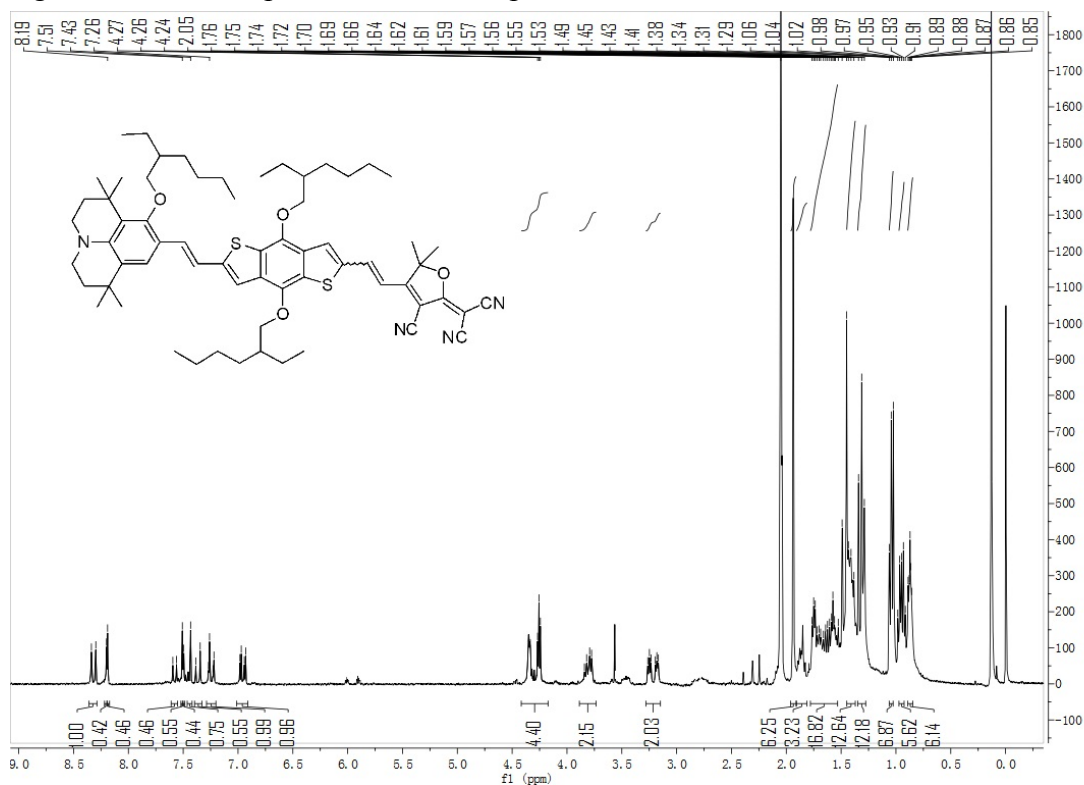

Figure 7.  $^1\text{H}$  NMR spectrum of chromophore BDT2

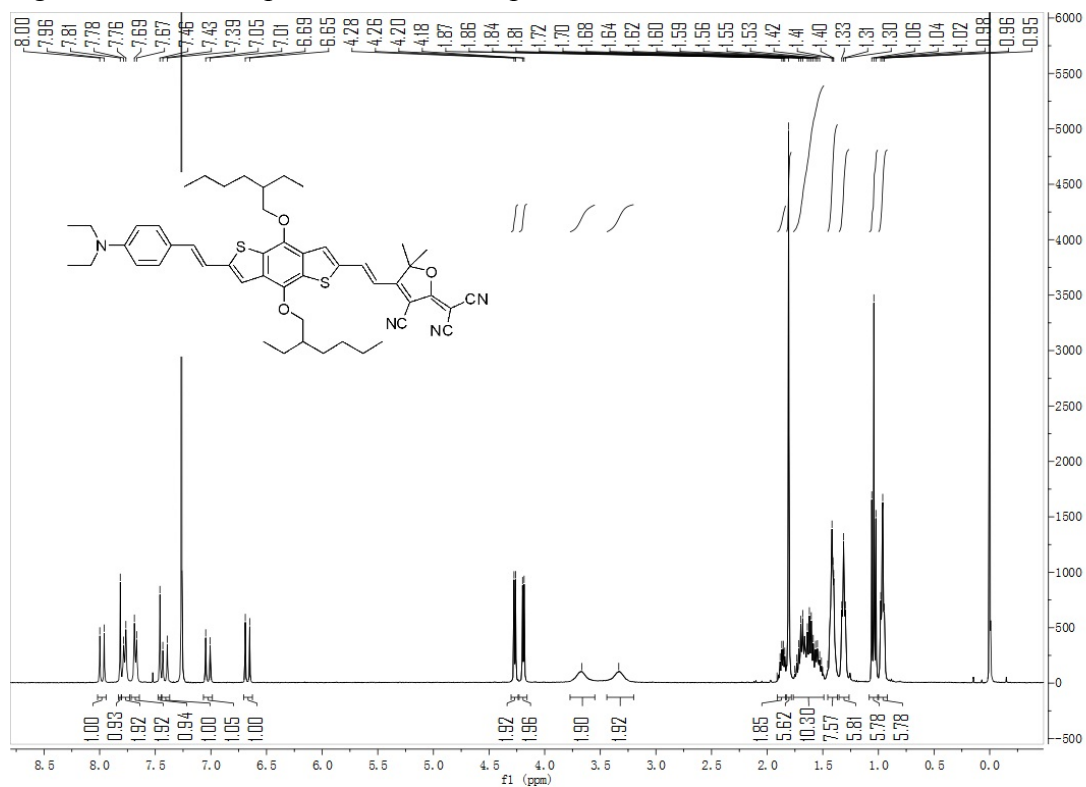

Figure 8.  $^{13}\text{C}$  NMR spectrum of chromophore BDT2

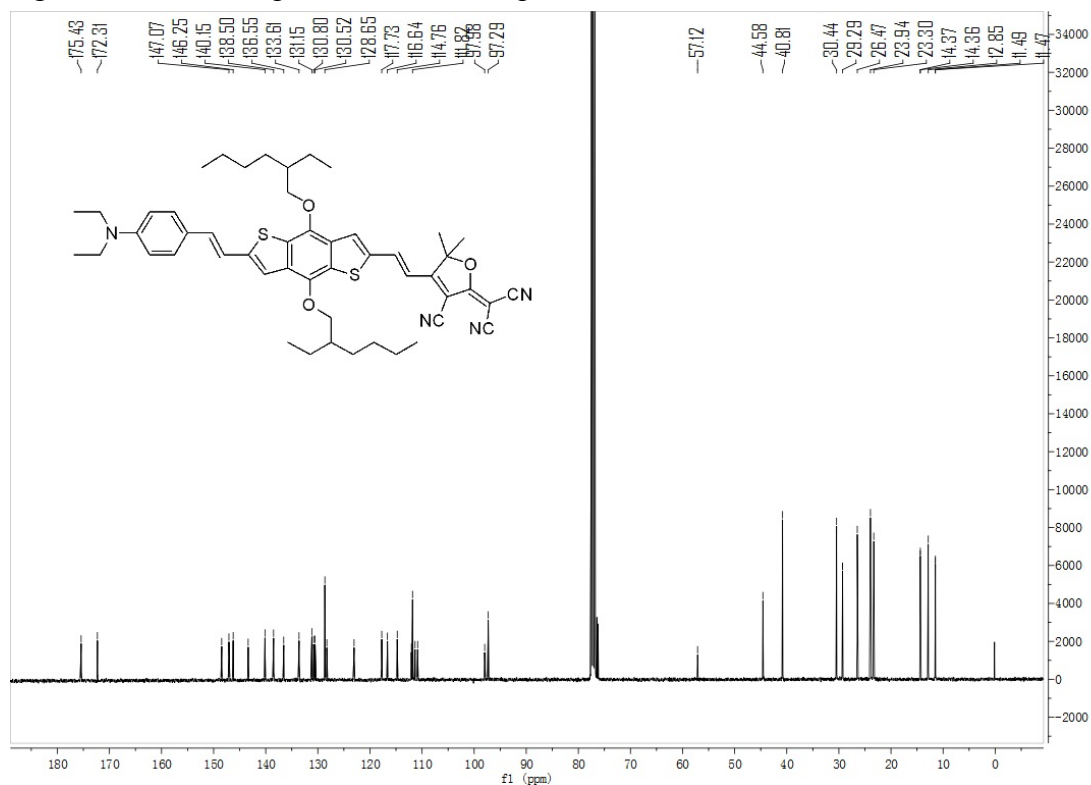

Figure 9. HRMS spectrum of chromophore BDT2

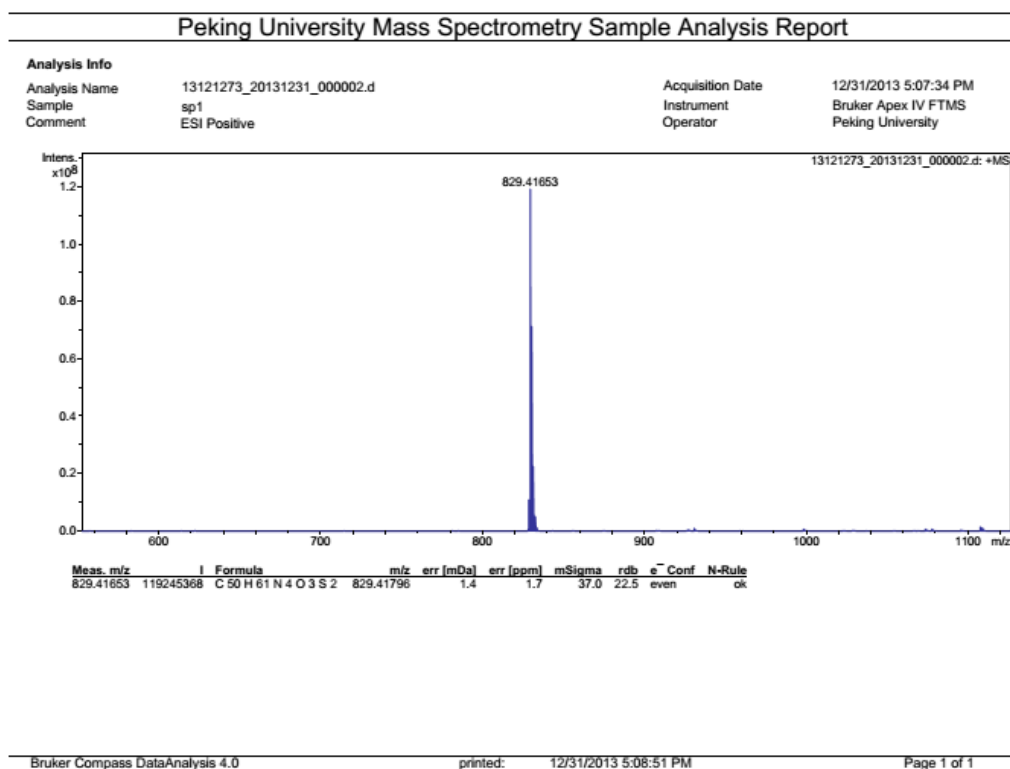

Figure 10. HRMS spectrum of chromophore BDT3

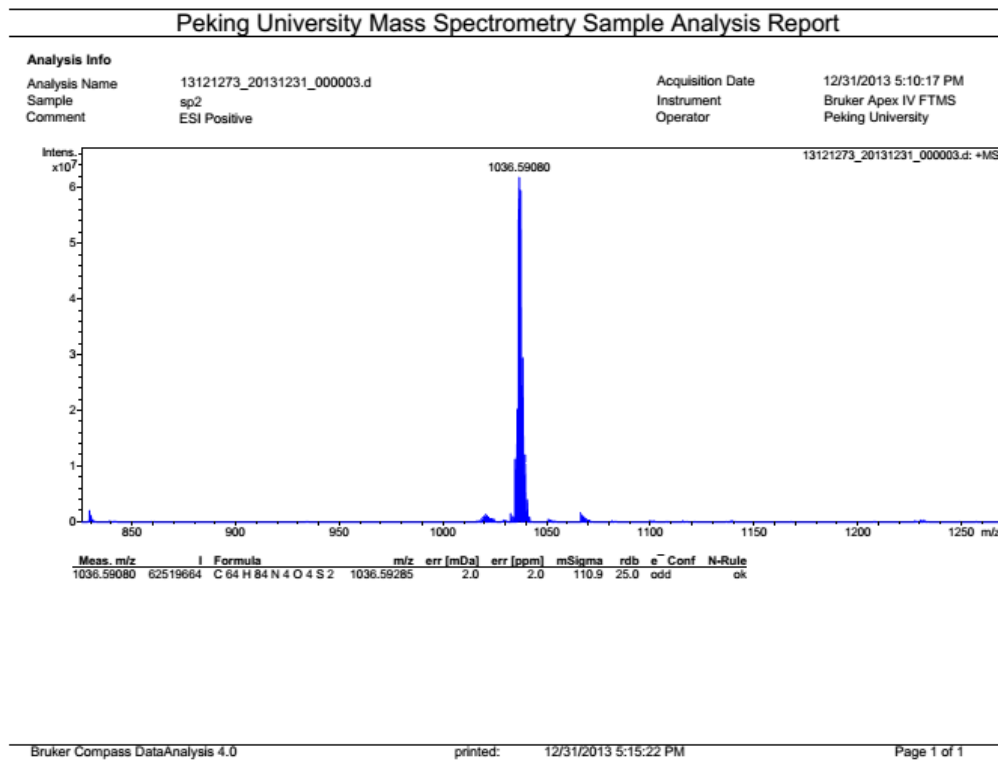

Supplement: c4ra01767f1.pdf [file c4ra01767f1.pdf]
